# Supplementary material
Source: PubMed Central journal article supplement (PMC3684025)

## Patient A-Severe Disease

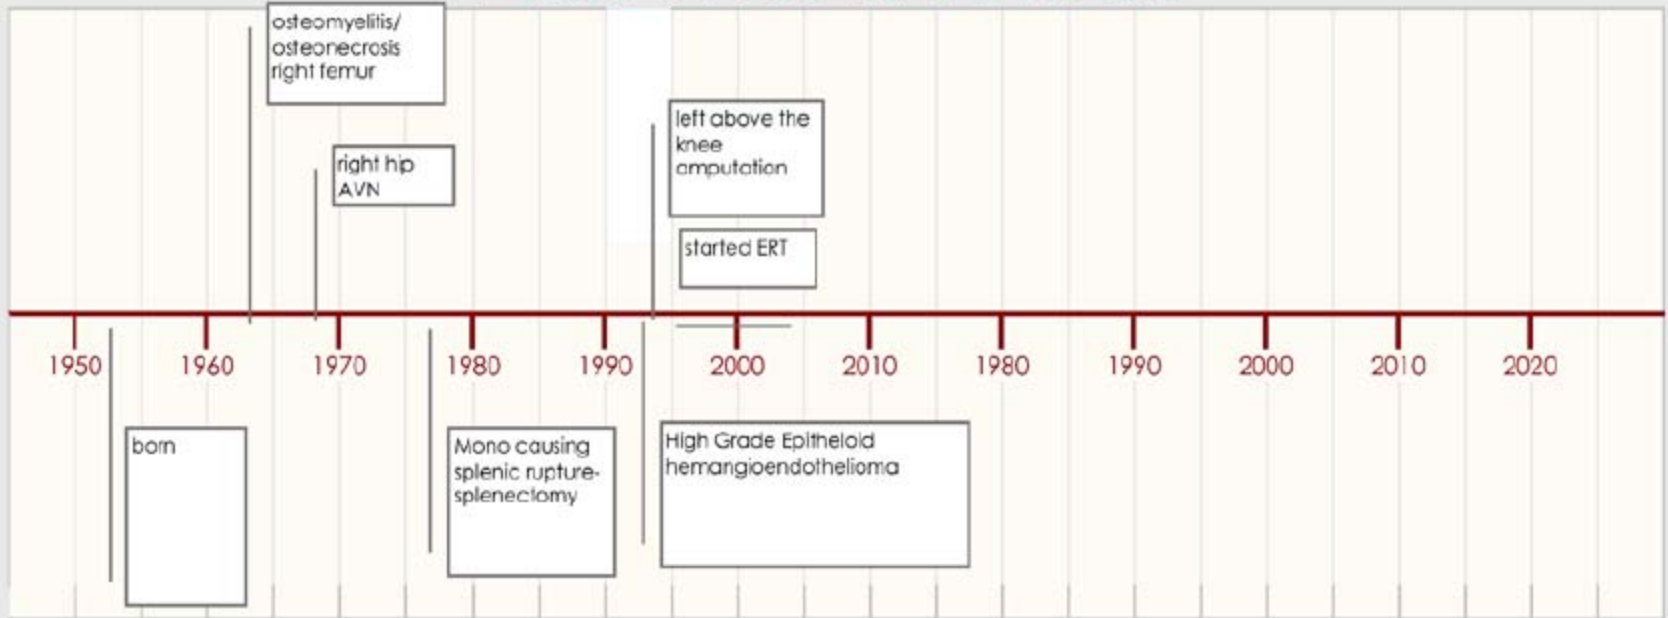

## Patient B-Mild Disease

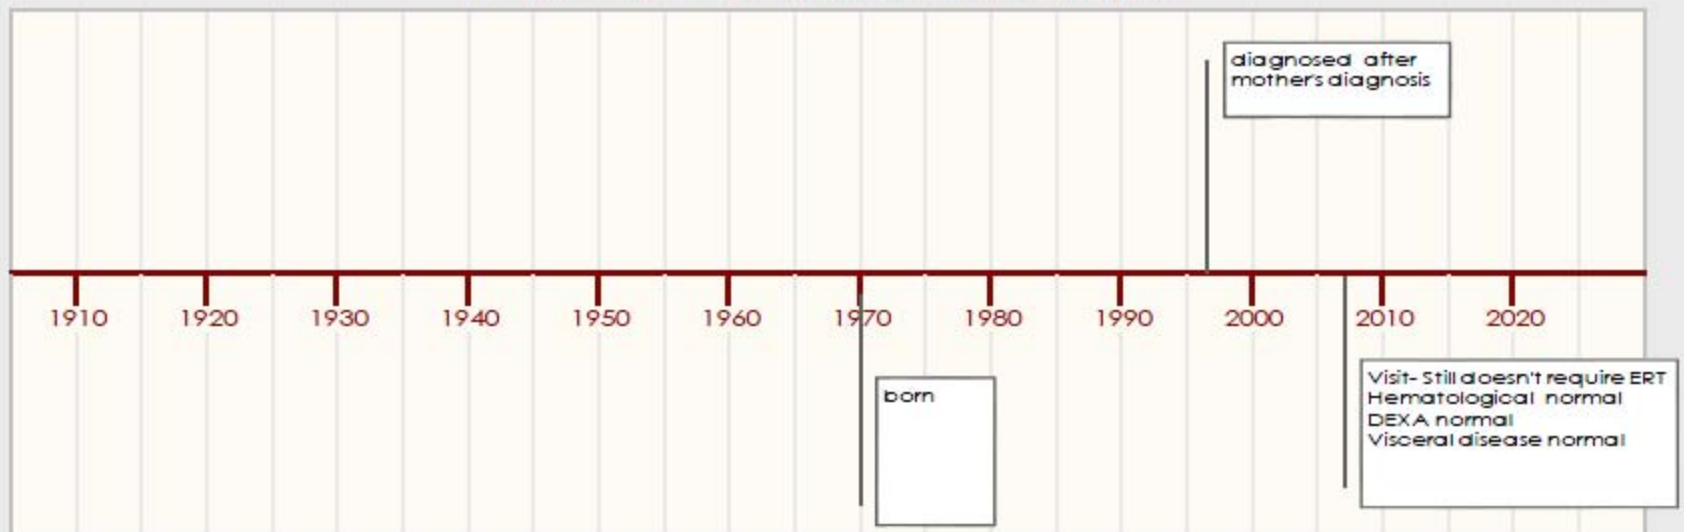

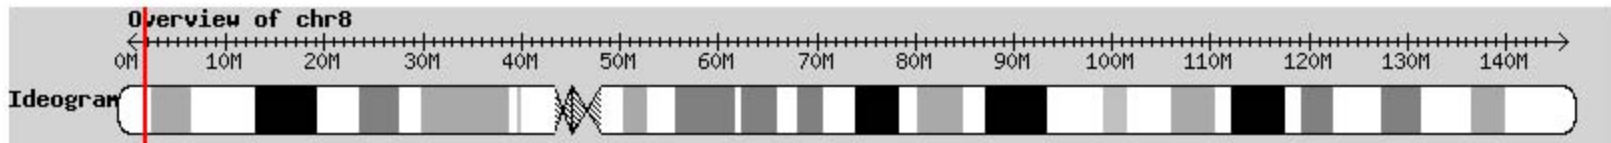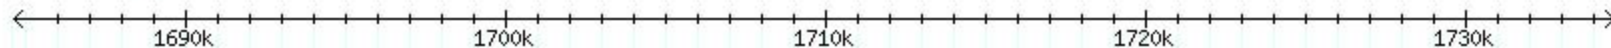

**Entrez genes**

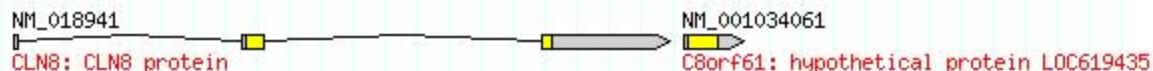

- Schadt et al. (2007):  $-\log_{10}(P)$ , liver, 427 ids, European descent
- Myers et al. (2007):  $-\log_{10}(P)$ , cortex from control brain, 279 ids, European descent
- Stranger et al. (2007):  $-\log_{10}(P)$ , LCLs, 210 HAPMAP ids, 4 single populations.
- Veyrieras et al. (2008):  $-\log_{10}(P)$ , LCLs, 210 HAPMAP ids, multi-population.
- Veyrieras et al. (2008): posterior probability, LCLs, 210 HAPMAP ids, multi-population.
- Pickrell et al. (2010):  $-\log_{10}(P)$ , LCLs, 69 Nigerian HAPMAP ids, RNA-Seq for eQTLs.
- Pickrell et al. (2010):  $-\log_{10}(P)$ , LCLs, 69 Nigerian HAPMAP ids, RNA-Seq for splicing QTLs.
- Montgomery et al. (2010):  $-\log_{10}(P)$ , LCLs, 60 European HAPMAP ids, RNA-Seq for transcript QTLs.
- Zeller et al. (2010):  $-\log_{10}(P)$ , Monocytes, 1,490 ids recruited in Germany.
- Montgomery et al. (2010):  $-\log_{10}(P)$ , LCLs, 60 European HAPMAP ids, RNA-Seq for exon QTLs.
- Dinas et al. (2009):  $-\log_{10}(P)$ , Fibroblasts, 75 Europeans
- Dinas et al. (2009):  $-\log_{10}(P)$ , LCLs, 75 Europeans
- Dinas et al. (2009):  $-\log_{10}(P)$ , T-cells, 75 Europeans

**All putative eQTL SNPs (linked to details and colored by study and type - Hollow = cis; Solid = trans)**

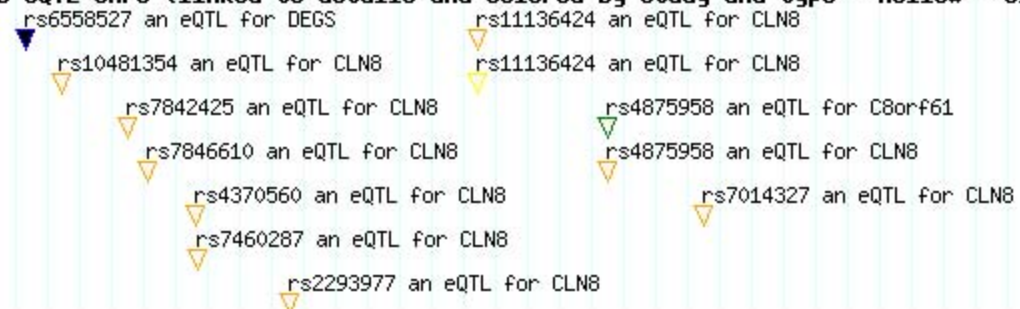

# Relative expression in normal human tissues

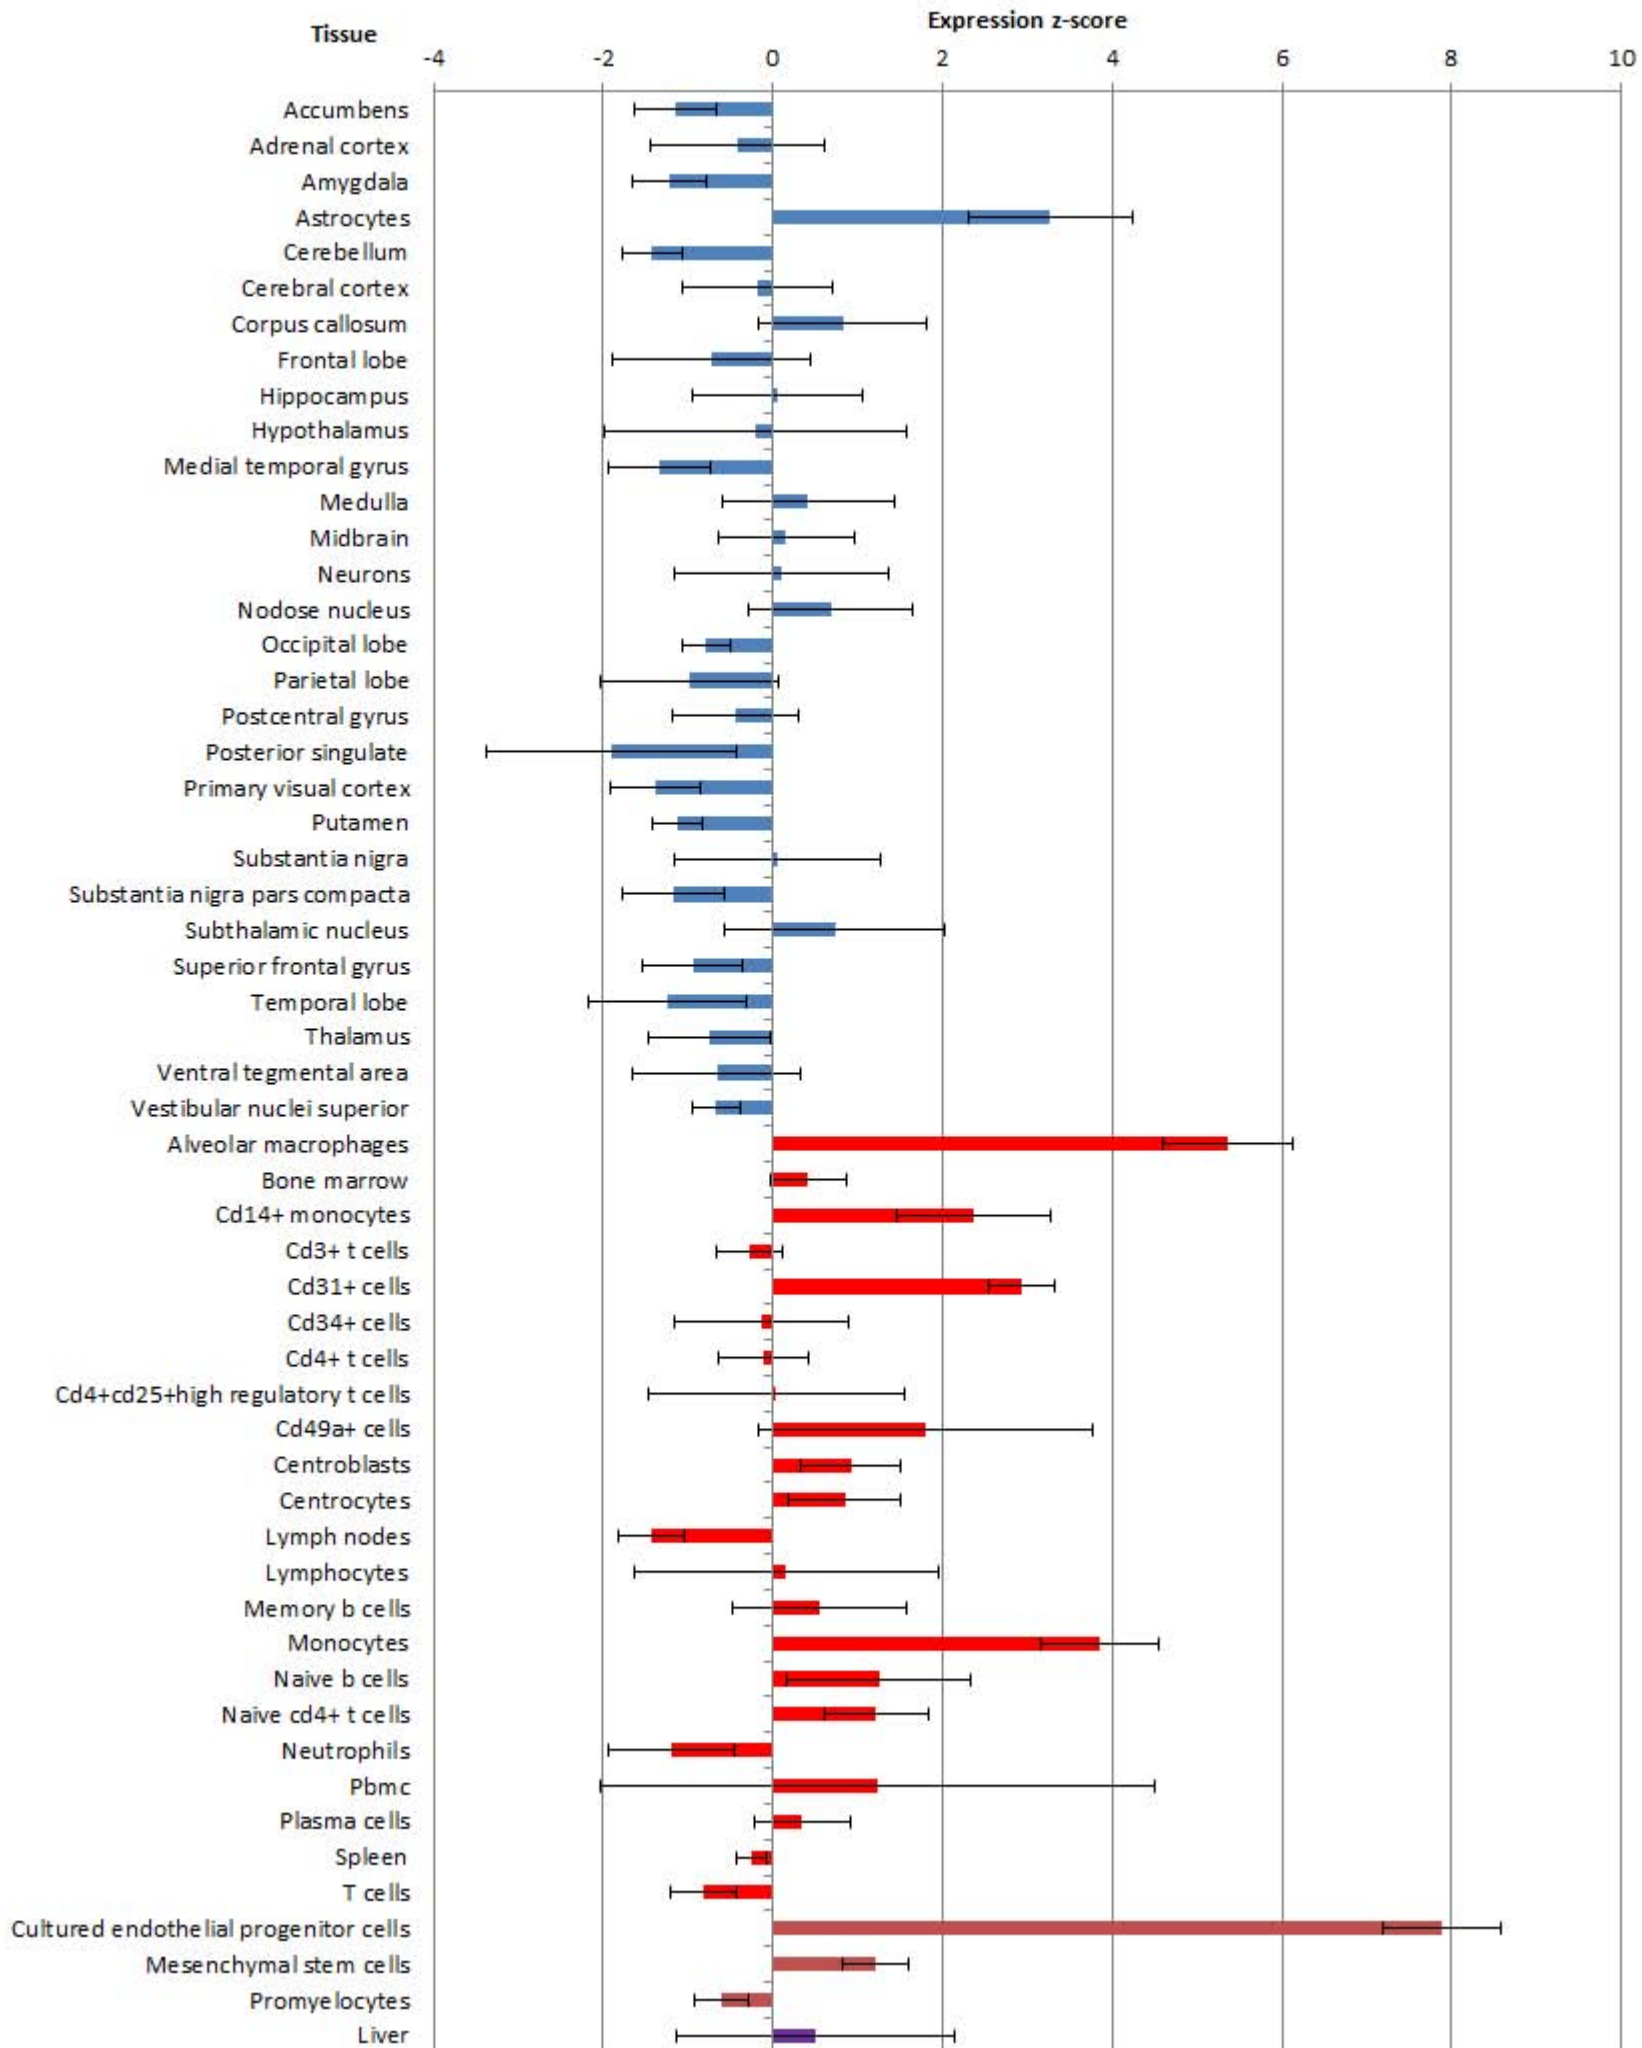

Supplement: NIHMS467231-supplement-Supp_Fig_S1-S3.pdf [file NIHMS467231-supplement-Supp_Fig_S1-S3.pdf]
